# Supplementary material
Source: PubMed Central journal article supplement (PMC6883148)
Supplement: NIHMS1529331-supplement-Supp_1.pdf [file NIHMS1529331-supplement-Supp_1.pdf]

## Supplemental Online Materials

*Table S1.* Unconstrained polychoric correlations at wave one (above the diagonal) and wave two (below the diagonal).

|      | PHQ1 | PHQ2 | PHQ3 | PHQ4 | PHQ5 | PHQ6 | PHQ7 | PHQ8 | PHQ9 | GAD1 | GAD2 | GAD3 | GAD4 | GAD5 | GAD6 | GAD7 |
|------|------|------|------|------|------|------|------|------|------|------|------|------|------|------|------|------|
| PHQ1 | -    | 0.80 | 0.62 | 0.70 | 0.55 | 0.69 | 0.65 | 0.64 | 0.65 | 0.48 | 0.60 | 0.59 | 0.57 | 0.51 | 0.59 | 0.51 |
| PHQ2 | 0.84 | -    | 0.63 | 0.65 | 0.57 | 0.76 | 0.63 | 0.66 | 0.78 | 0.59 | 0.68 | 0.67 | 0.59 | 0.54 | 0.63 | 0.62 |
| PHQ3 | 0.63 | 0.54 | -    | 0.75 | 0.57 | 0.55 | 0.54 | 0.49 | 0.44 | 0.54 | 0.62 | 0.56 | 0.58 | 0.54 | 0.52 | 0.47 |
| PHQ4 | 0.77 | 0.66 | 0.72 | -    | 0.62 | 0.56 | 0.62 | 0.53 | 0.49 | 0.53 | 0.56 | 0.59 | 0.58 | 0.43 | 0.59 | 0.41 |
| PHQ5 | 0.63 | 0.60 | 0.59 | 0.66 | -    | 0.57 | 0.58 | 0.54 | 0.47 | 0.36 | 0.43 | 0.50 | 0.40 | 0.42 | 0.50 | 0.46 |
| PHQ6 | 0.68 | 0.79 | 0.47 | 0.58 | 0.64 | -    | 0.59 | 0.59 | 0.74 | 0.60 | 0.65 | 0.66 | 0.56 | 0.52 | 0.56 | 0.62 |
| PHQ7 | 0.69 | 0.63 | 0.63 | 0.69 | 0.61 | 0.60 | -    | 0.64 | 0.55 | 0.48 | 0.55 | 0.57 | 0.60 | 0.60 | 0.61 | 0.46 |
| PHQ8 | 0.72 | 0.66 | 0.58 | 0.62 | 0.61 | 0.59 | 0.72 | -    | 0.69 | 0.47 | 0.51 | 0.51 | 0.49 | 0.62 | 0.55 | 0.52 |
| PHQ9 | 0.68 | 0.77 | 0.51 | 0.57 | 0.47 | 0.79 | 0.58 | 0.61 | -    | 0.51 | 0.54 | 0.57 | 0.46 | 0.44 | 0.43 | 0.52 |
| GAD1 | 0.51 | 0.63 | 0.53 | 0.56 | 0.43 | 0.56 | 0.54 | 0.56 | 0.56 | -    | 0.77 | 0.72 | 0.69 | 0.61 | 0.49 | 0.61 |
| GAD2 | 0.61 | 0.70 | 0.56 | 0.56 | 0.48 | 0.64 | 0.58 | 0.56 | 0.59 | 0.81 | -    | 0.91 | 0.73 | 0.60 | 0.53 | 0.71 |
| GAD3 | 0.63 | 0.68 | 0.51 | 0.59 | 0.51 | 0.65 | 0.52 | 0.52 | 0.54 | 0.75 | 0.86 | -    | 0.75 | 0.61 | 0.53 | 0.69 |
| GAD4 | 0.64 | 0.63 | 0.57 | 0.68 | 0.54 | 0.56 | 0.62 | 0.58 | 0.57 | 0.76 | 0.74 | 0.73 | -    | 0.73 | 0.58 | 0.62 |
| GAD5 | 0.57 | 0.54 | 0.49 | 0.50 | 0.45 | 0.40 | 0.62 | 0.70 | 0.45 | 0.65 | 0.63 | 0.57 | 0.67 | -    | 0.63 | 0.60 |
| GAD6 | 0.65 | 0.58 | 0.49 | 0.62 | 0.55 | 0.52 | 0.60 | 0.56 | 0.54 | 0.58 | 0.57 | 0.60 | 0.65 | 0.62 | -    | 0.51 |
| GAD7 | 0.55 | 0.61 | 0.52 | 0.52 | 0.54 | 0.59 | 0.54 | 0.58 | 0.54 | 0.69 | 0.76 | 0.71 | 0.64 | 0.62 | 0.59 | -    |

Table S2. All six pairwise comparisons using the complementary metrics for network comparison among the four individually estimated PTSD symptom networks in Fried et al. (2018).

| Network characteristic                                                | Complementary metric for comparison                                                | Pairwise Network Comparisons (A vs. B) |                       |                       |                       |                       |                       |
|-----------------------------------------------------------------------|------------------------------------------------------------------------------------|----------------------------------------|-----------------------|-----------------------|-----------------------|-----------------------|-----------------------|
|                                                                       |                                                                                    | Sample 1 vs. Sample 2                  | Sample 1 vs. Sample 3 | Sample 1 vs. Sample 4 | Sample 2 vs. Sample 3 | Sample 2 vs. Sample 4 | Sample 3 vs. Sample 4 |
| Non-zero (present) edges                                              | Number in Network A                                                                | 77                                     | 77                    | 77                    | 73                    | 73                    | 77                    |
|                                                                       | Number in Network B                                                                | 73                                     | 77                    | 77                    | 77                    | 77                    | 77                    |
|                                                                       | Total edges estimated in A or B                                                    | 94                                     | 98                    | 100                   | 95                    | 99                    | 95                    |
|                                                                       | Number of edges estimated consistently (present and with the same sign) in A and B | 54                                     | 54                    | 54                    | 54                    | 51                    | 58                    |
|                                                                       | Number of edges that reversed in sign (e.g., positive to negative)                 | 2                                      | 2                     | 0                     | 1                     | 0                     | 1                     |
|                                                                       | Proportion of edges replicated ( <i>unreplicated</i> ) from Network A              | 70.1% (29.9%)                          | 70.1% (29.9%)         | 70.1% (29.9%)         | 74.0% (26.0%)         | 69.9% (30.1%)         | 75.3% (24.7%)         |
|                                                                       | Proportion of edges replicated ( <i>unreplicated</i> ) from Network B              | 74.0% (26.0%)                          | 70.1% (29.9%)         | 70.1% (29.9%)         | 70.1% (29.9%)         | 66.2% (33.8%)         | 75.3% (24.7%)         |
|                                                                       | Proportion of total edges replicated ( <i>unreplicated</i> )                       | 57.4% (42.6%)                          | 55.1% (44.9%)         | 54.0% (46.0%)         | 56.8% (43.2%)         | 51.5% (48.5%)         | 61.1% (38.9%)         |
|                                                                       | Zero (absent) edges                                                                | Number in Network A                    | 43                    | 43                    | 43                    | 47                    | 47                    |
| Number in Network B                                                   |                                                                                    | 47                                     | 43                    | 43                    | 43                    | 43                    | 43                    |
| Total edges estimated in A or B                                       |                                                                                    | 64                                     | 64                    | 66                    | 65                    | 69                    | 61                    |
| Number of edges estimated consistently (absent) in A and B            |                                                                                    | 26                                     | 22                    | 20                    | 25                    | 21                    | 25                    |
| Proportion of edges replicated ( <i>unreplicated</i> ) from Network A |                                                                                    | 60.5% (39.5%)                          | 51.2% (48.8%)         | 46.5% (53.5%)         | 53.2% (46.8%)         | 44.7% (55.3%)         | 58.1% (41.9%)         |
| Proportion of edges replicated ( <i>unreplicated</i> ) from Network B |                                                                                    | 55.3% (44.7%)                          | 51.2% (48.8%)         | 46.5% (53.5%)         | 58.1% (41.9%)         | 48.8% (51.2%)         | 58.1% (41.9%)         |
| Proportion of total edges replicated ( <i>unreplicated</i> )          |                                                                                    | 40.6% (59.4%)                          | 34.4% (65.6%)         | 30.3% (69.7%)         | 38.5% (61.5%)         | 30.4% (69.6%)         | 41.0% (59.0%)         |

Table S2. (continued)

| Network characteristic                                                                            | Complementary metric for comparison                                                | Pairwise Network Comparisons (A vs. B) |                       |                       |                       |                       |                       |
|---------------------------------------------------------------------------------------------------|------------------------------------------------------------------------------------|----------------------------------------|-----------------------|-----------------------|-----------------------|-----------------------|-----------------------|
|                                                                                                   |                                                                                    | Sample 1 vs. Sample 2                  | Sample 1 vs. Sample 3 | Sample 1 vs. Sample 4 | Sample 2 vs. Sample 3 | Sample 2 vs. Sample 4 | Sample 3 vs. Sample 4 |
| Edges with bootstrapped 95% confidence intervals that do not include zero (“bootnet-significant”) | Number in Network A                                                                | 26                                     | 26                    | 26                    | 17                    | 17                    | 34                    |
|                                                                                                   | Number in Network B                                                                | 17                                     | 34                    | 27                    | 34                    | 27                    | 27                    |
|                                                                                                   | Total edges estimated in A or B                                                    | 34                                     | 40                    | 36                    | 37                    | 34                    | 43                    |
|                                                                                                   | Number of edges estimated consistently (present and with the same sign) in A and B | 9                                      | 20                    | 17                    | 14                    | 10                    | 18                    |
|                                                                                                   | Number of edges that reversed in sign (e.g., positive to negative)                 | 0                                      | 0                     | 0                     | 0                     | 0                     | 0                     |
|                                                                                                   | Proportion of edges consistent ( <i>inconsistent</i> ) from Network A              | 34.6% (65.4%)                          | 76.9% (23.1%)         | 65.4% (34.6%)         | 82.4% (17.6%)         | 58.8% (41.2%)         | 52.9% (47.1%)         |
|                                                                                                   | Proportion of edges consistent ( <i>inconsistent</i> ) from Network B              | 52.9% (47.1%)                          | 58.8% (41.2%)         | 63.0% (37.0%)         | 41.2% (58.8%)         | 37.0% (63.0%)         | 66.7% (33.3%)         |
|                                                                                                   | Proportion of total edges consistent ( <i>inconsistent</i> )                       | 26.5% (73.5%)                          | 50.0% (50.0%)         | 47.2% (52.8%)         | 37.8% (62.2%)         | 29.4% (70.6%)         | 41.9% (58.1%)         |
|                                                                                                   | Average % change in consistent “bootnet-significant” edges                         | From A to B                            | 46.5%                 | 39.4%                 | 20.9%                 | 24.9%                 | 49.3%                 |
| From B to A                                                                                       |                                                                                    | 52.1%                                  | 43.5%                 | 24.6%                 | 36.0%                 | 82.2%                 | 55.7%                 |
| Symptom strength centrality                                                                       | Spearman's rho                                                                     | 0.50                                   | 0.38                  | 0.40                  | 0.42                  | 0.60                  | 0.45                  |
|                                                                                                   | Kendall's tau-b                                                                    | 0.38                                   | 0.25                  | 0.30                  | 0.30                  | 0.45                  | 0.35                  |
|                                                                                                   | Number and proportion of possible rank-order matches                               | 4 (25%)                                | 2 (12.5%)             | 2 (12.5%)             | 0 (0%)                | 4 (25%)               | 2 (12.5%)             |

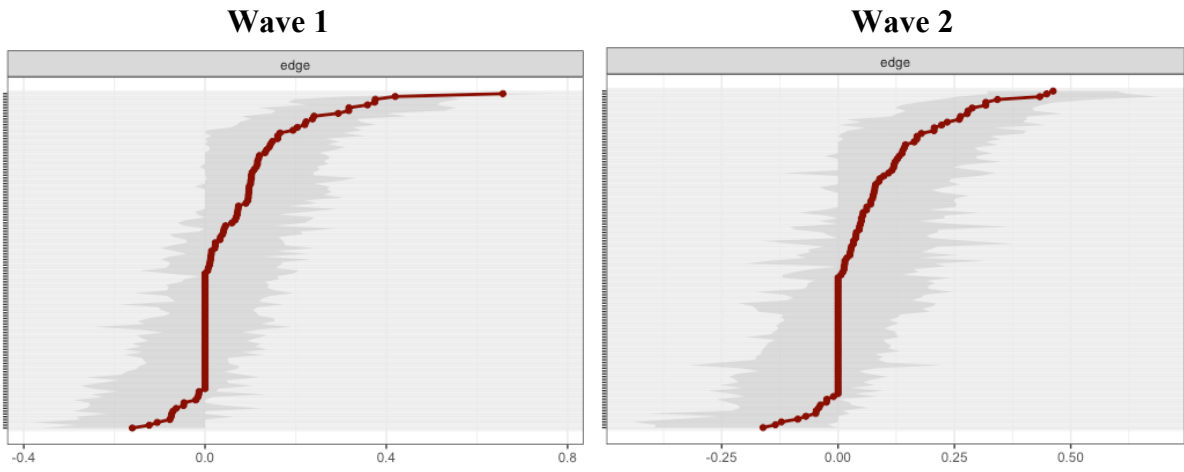

**Figure S1.** 95% confidence intervals for edge weights at each wave.



(A)

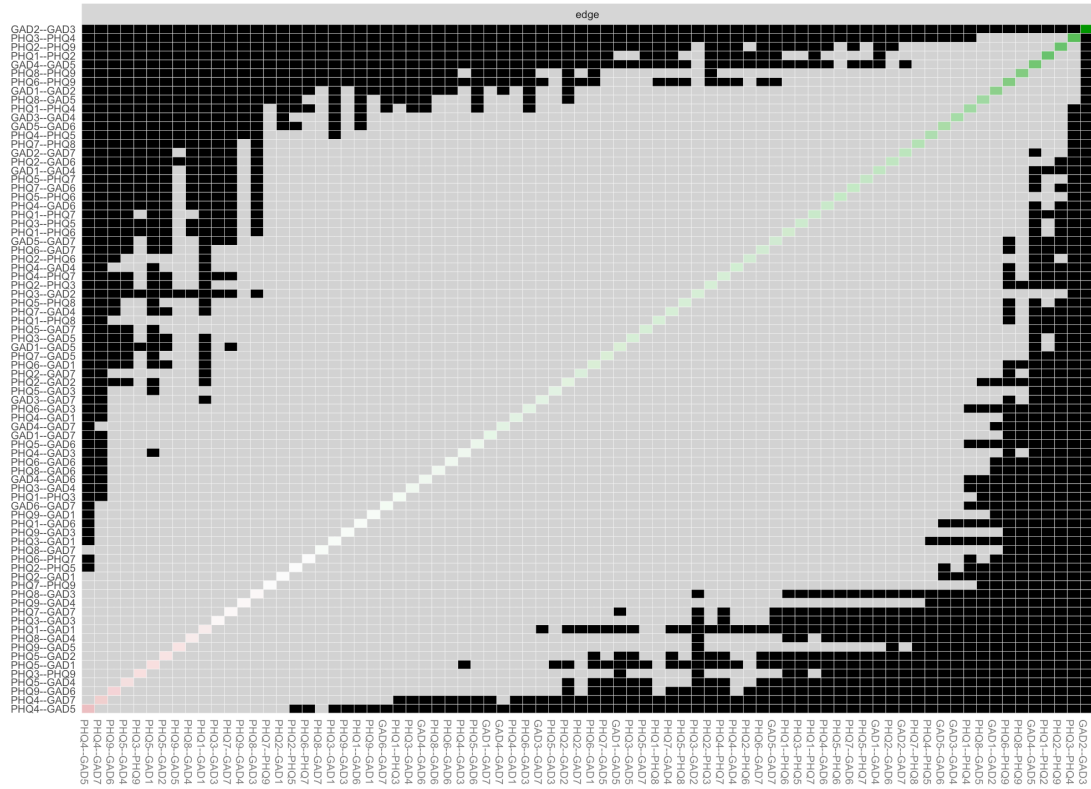

(B)

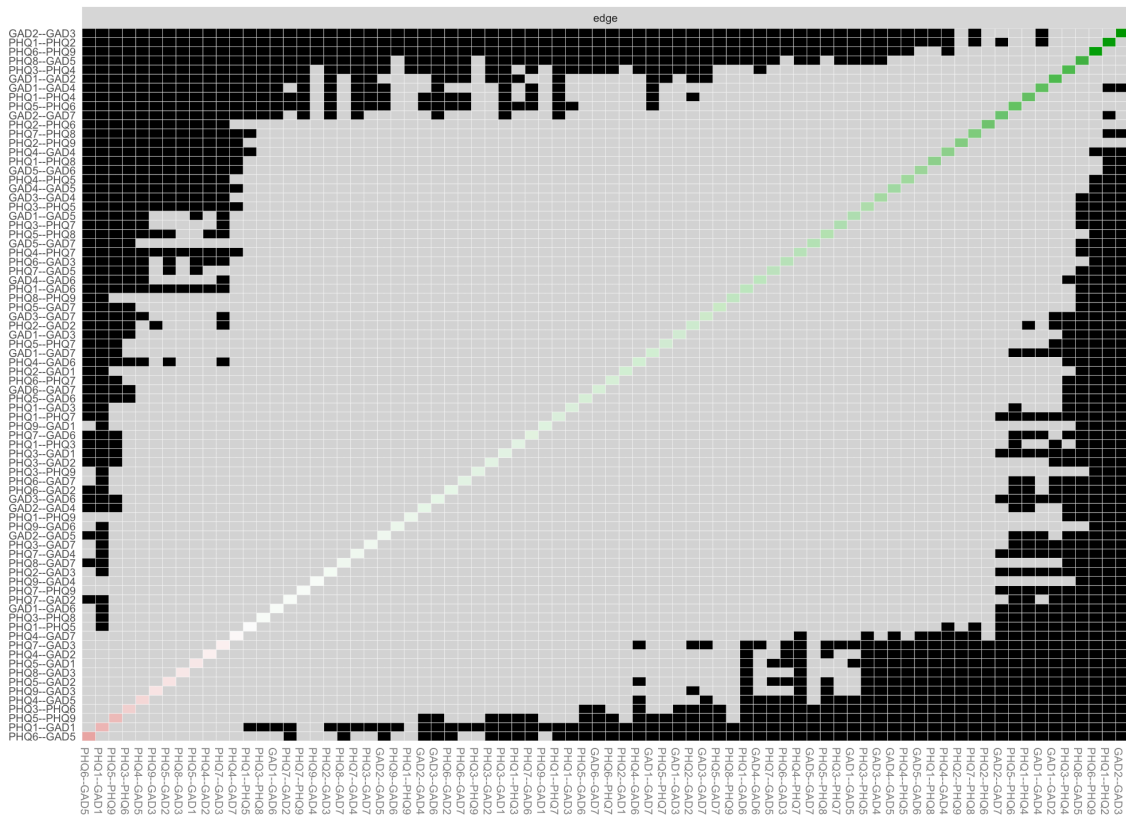

**Figure S2.** Significance of difference tests between edges within each network. (A) Wave 1; (B) Wave 2.



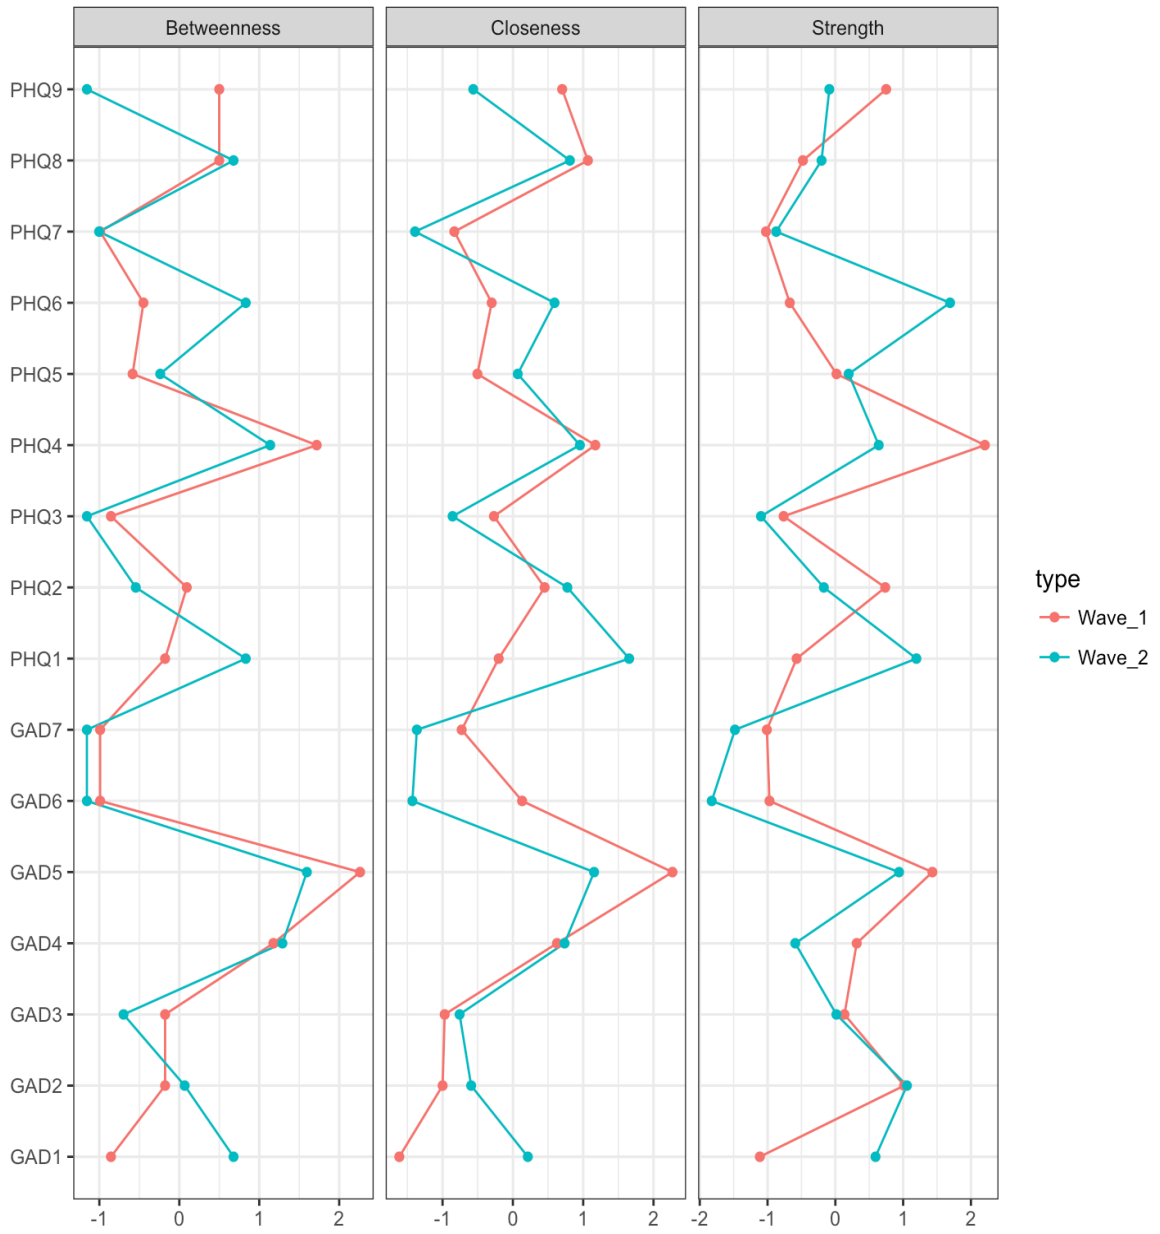

**Figure S5.** Standardized symptom centrality estimates at each wave (plotted as z-scores, per *centralityPlot* in the *qgraph* package in R).

Sample 1 (n = 526)

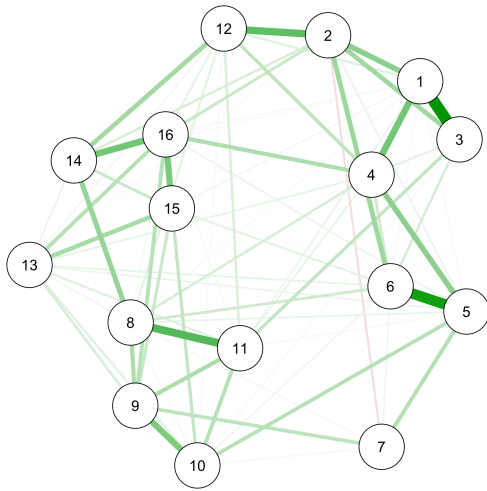

Sample 2 (n = 365)

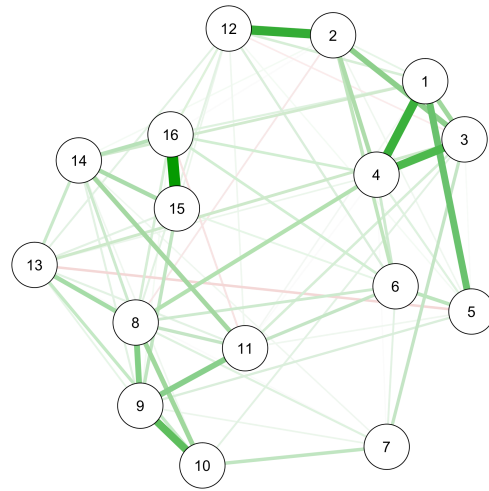

Sample 3 (n = 926)

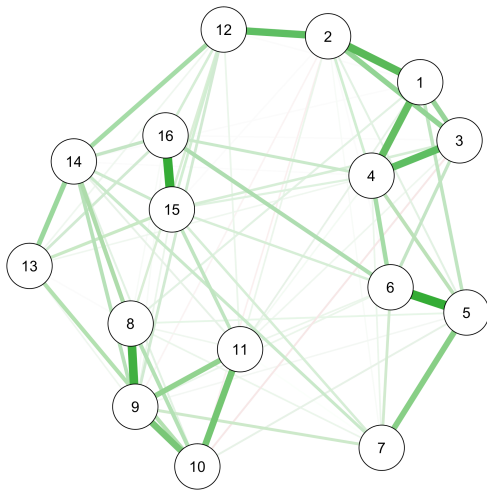

Sample 4 (n = 965)

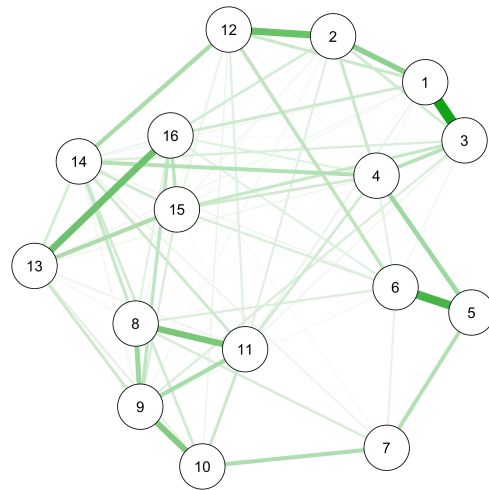

**Figure S6.** Individually estimated Gaussian graphical model PTSD symptom networks from Fried et al. (2018) using graphical lasso regularisation with EBIC.

Sample 1 (n = 526)

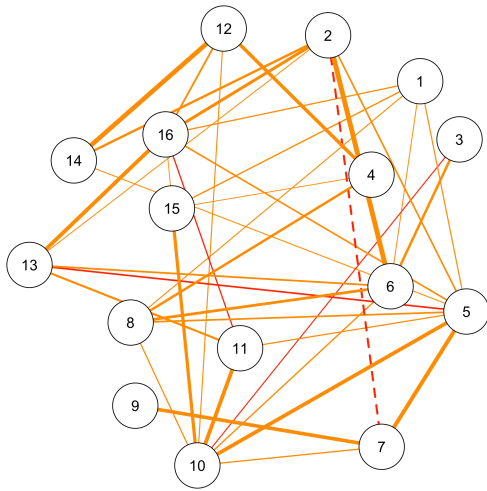

Sample 2 (n = 365)

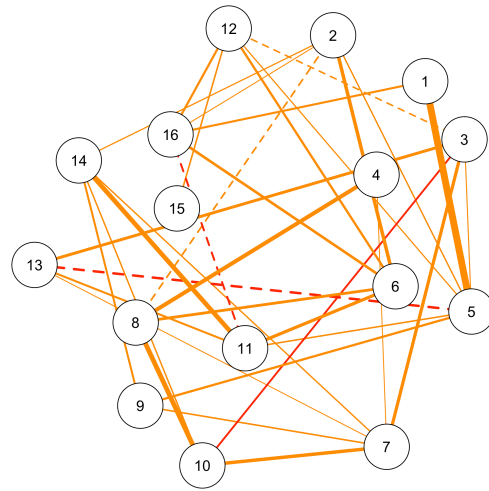

Sample 3 (n = 926)

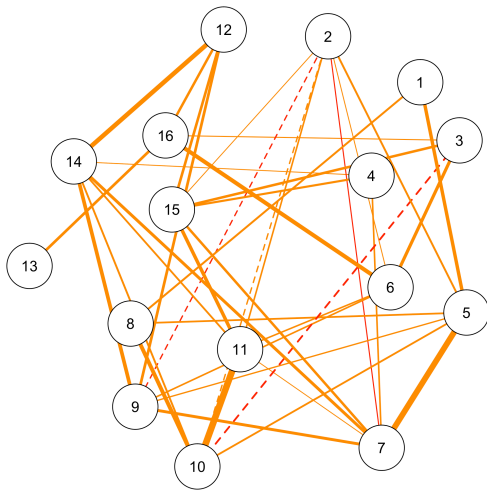

Sample 4 (n = 965)

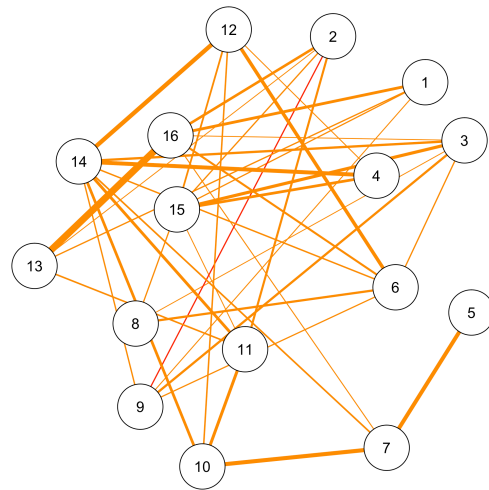

**Figure S7.** Inconsistently estimated edges among the four PTSD symptom networks. Orange edges were inconsistently estimated (present/absent), red edges reversed in sign, and dashed edges are negative.

Sample 1 (n = 526)

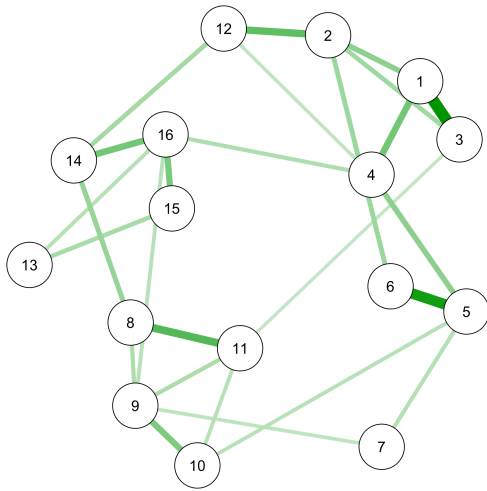

Sample 2 (n = 365)

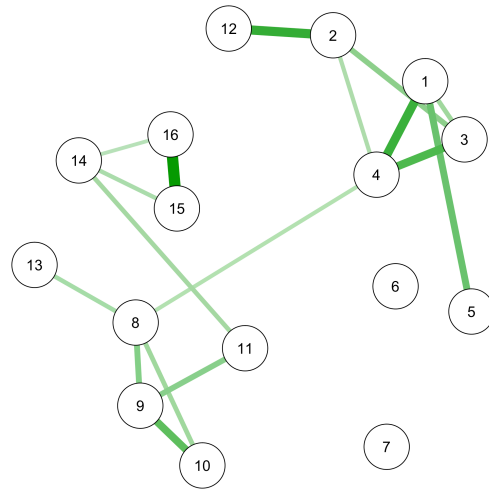

Sample 3 (n = 926)

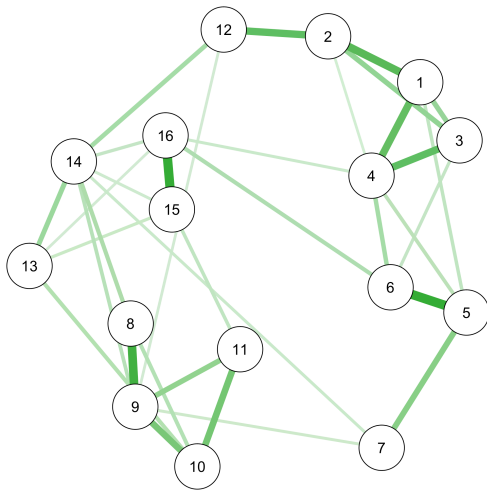

Sample 4 (n = 965)

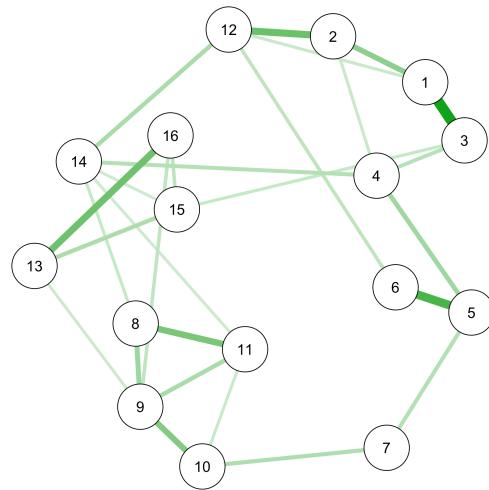

**Figure S8.** Subsets of the networks in Figure S5 showing the edges in each network with 95% bootstrapped confidence intervals that did not include zero (“bootnet-significant” edges).

Sample 1 (n = 526)

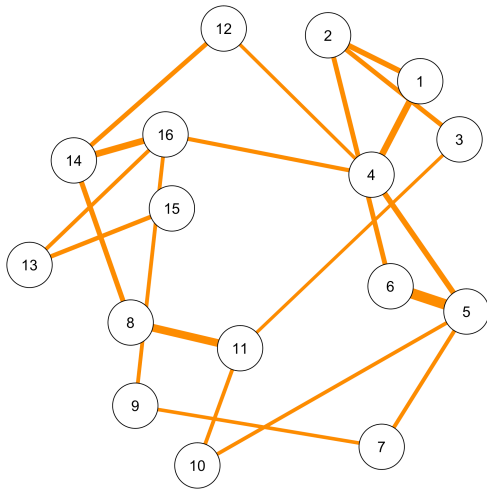

Sample 2 (n = 365)

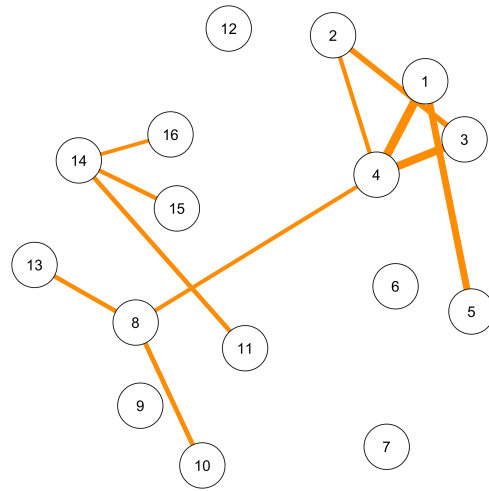

Sample 3 (n = 926)

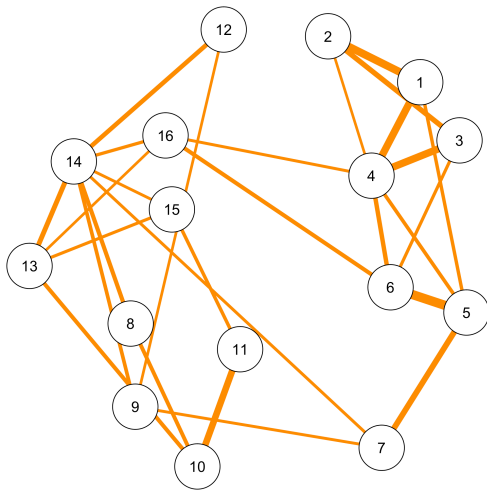

Sample 4 (n = 965)

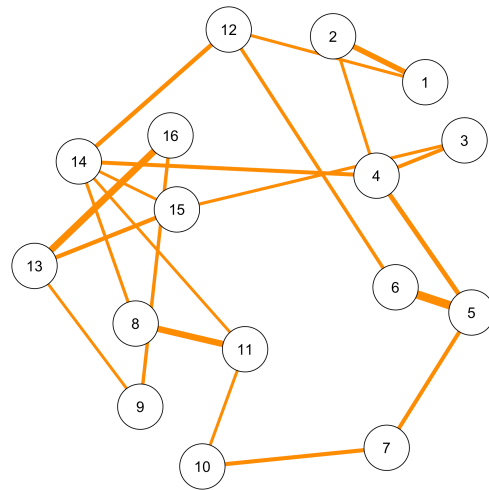

**Figure S9.** Inconsistently estimated edges among the four “*bootnet*-significant” edge networks in Figure S7.
